# Supplementary material for: Junctate boosts phagocytosis by recruiting endoplasmic reticulum Ca2+ stores near phagosomes
Source: Oxford University Press journal article supplement (doi:10.1242/jcs.172510), 2015-01-01
Supplement: jcs172510supp.pdf [file jcs172510supp.pdf]

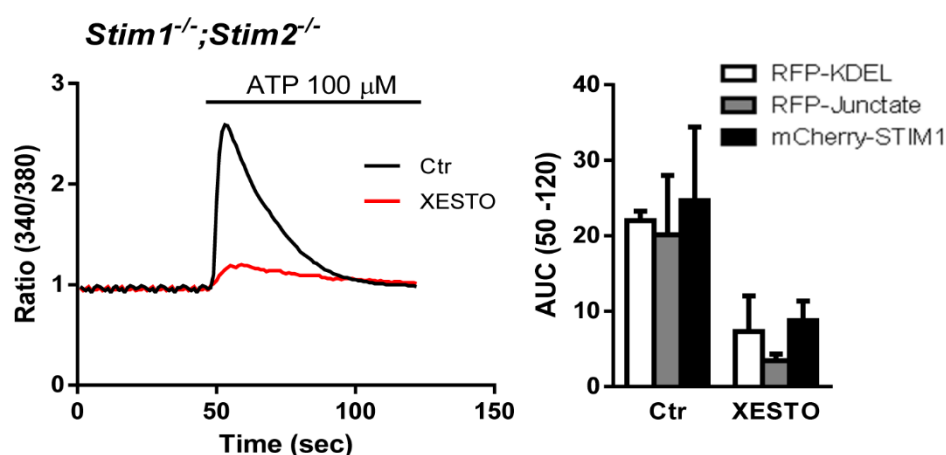

**Figure S1. The effects of inhibitors  $\text{La}^{3+}$  and xestospongin C.** Representative fura-2 ratio fluorescence changes evoked by the addition of 100  $\mu\text{M}$  ATP without (black) and after 20 min incubation with 20  $\mu\text{M}$  of xestospongin C (red) in *Stim1*<sup>-/-</sup>; *Stim2*<sup>-/-</sup> MEFs (left panel). The right panel shows the quantification of the area under the curve of the agonist evoked  $\text{Ca}^{2+}$  responses. Data are means  $\pm$  s.e.m. of 3 independent experiments, comprised of 20 cells per experiment per condition.

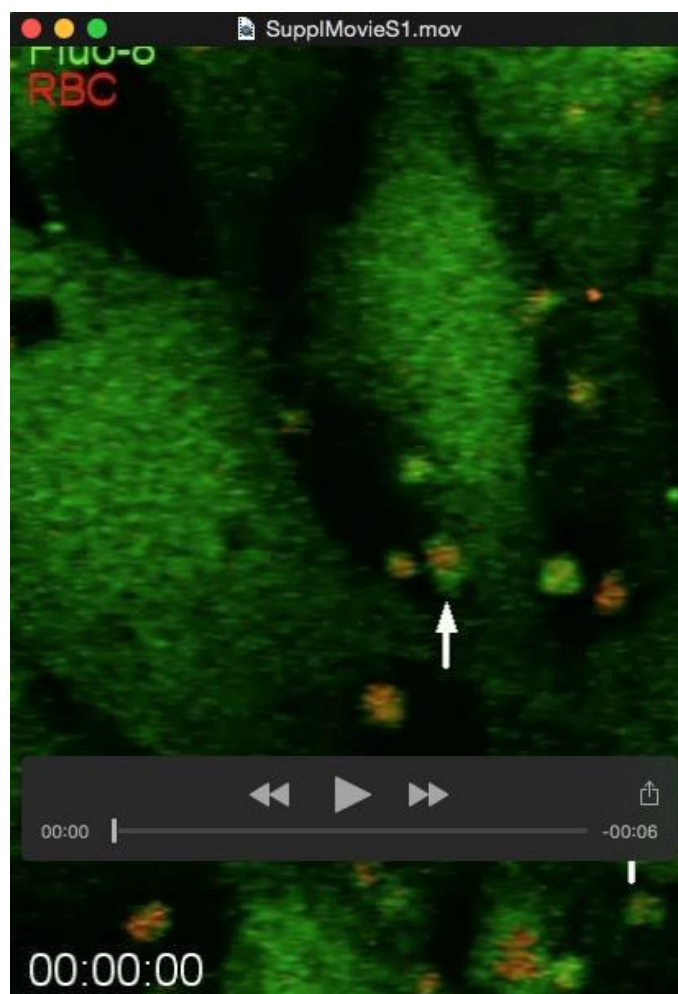

**Supplementary Movie S1. Periphagosomal Ca<sup>2+</sup> hotspots in junctate-expressing MEFs.**

Confocal time-lapse images of RFP-junctate-expressing *Stim1*<sup>-/-</sup> phagocytic MEFs loaded with the Ca<sup>2+</sup> sensitive dye Fluo-8-AM (green) revealed both global (whole cell) as well as local (arrows) Ca<sup>2+</sup> elevations when cells were exposed to opsonized RBCs (red). Images were acquired 5 min after addition of phagocytic targets, every 12 sec for 20 min.
